# Supplementary material
Source: Research Square preprint supplement (doi:10.21203/rs.3.rs-9760286/v1)
Supplement: Supplementary file 1 [file b4f2ee16b59c6dfdee4dc5bf.docx]

**Additional file 1**

**Study Questionnaire (English-language version)**

**Computer Vision Syndrome Prevalence and Associated Risk Factors among Mai**-**Nefhi College Students (CVS-Q)**

**Part I: Socio-demographic questions**

| **S.no** | **Questions** | **Response** |
| --- | --- | --- |
| 101 | Age (In complete years) |  |
| 102 | Sex | - 1.Male - 2.Female |
| 103 | Study program | - 1.Diploma - 2.Degree |
| 104 | Study year level | - 2nd year - 3rd year - 4th year - 5th year |

**Part- II: Health Status**

| 201 | Do you have any refractive errors? ***(Check all that apply)*** | - 1. Short sightedness - 2. Long sightedness - 3. Astigmatism - 4. No refractive errors |
| --- | --- | --- |
| 202 | Do you have any chronic eye diseases? ***(Check all that apply)*** | - 1. Conjunctivitis - 2. Cataract - 3. Glaucoma - 4. Diabetic retinopathy - 5. Eye allergy - 6. Other chronic eye disease   ***Please specify_____________***   - 7. No eye disorder |
| 203 | Do you have any following chronic health disorders ***(Check all that apply)***? | - 1. Hypertensive disease - 2. Diabetes - 3. Thyroid disease - 4. Epilepsy - 5. Allergy - 6. Other chronic disease   ***Please specify_____________***   - 7. No chronic health disorder |
| 204 | Do you smoke? | - 1. Daily - 2. Less than daily - 3. Not at all |

**Part-III: Associated risk factors**

**Direction:** The following section will include questions about your daily practice while using Video Display Terminal (VDT) devices. **VDT devices include computers, laptops, tablet, mobile phones and e-reader.** While answering the questions, consider the device which you most commonly used for all-purpose, ***provide suitable responses:***

|  | **Seating position, screen distance and glare** | |
| --- | --- | --- |
| 301 | What is your seating position while you are using the VDT devices? | - 1. Face at the level of the VDT device screen - 2. Face not at the level of the VDT device screen |
| 302 | What is your viewing distance while using the VDT devices | - <= 50cm (<= - > 50cm |
| 304 | Is there any **glare** *(“presence of bright light that disturbs the vision due to direct or reflected sunlight or overhead lamps”)* on the computer screen/ other VDT devices screen? | - 1. Yes - 2. No |
|  | **Duration of device use** | |
| 305 | How many days per week do you use computer/ other VDT devices? ***(circle one of the options)*** | 1 2 3 4 5 6 7 |
| 306 | How many hours per day do you work on the computer/ other VDT devices? | - <3 hours/day - 3-6 hours/day - >6 hours/day |
|  | **Awareness about computer vision syndrome** | |
| 307 | Have you heard of computer vision on syndrome? | - 1.Yes - 2.No |
| 308 | Are you aware of the preventive measures of computer vision syndrome? | - 1.Yes - 2.No |
|  | **Protective habits while using VDT devices** | |
| 309 | How often do you take a break while using computer/other VDT devices | - 1.Every 20 min - 2.Every 60 min - 3.Every 2 hours - 4.More than 2 hours |
| 310 | Do you use eyeglasses? | - 1. Yes - 2. No ***(Go to Q.313)*** |
| 311 | What is the purpose of your eyeglasses? | - 1. For computer/ other VDT device use - 2. For vision - 3.For other purpose, specify__________ |
| 312 | Does your eyeglasses contain anti-reflecting and/or blue light filter coating? | - 1. Yes - 2. No |
| 313 | Do you have habit of voluntary blinking? | - 1. Yes - 2. No |
| 314 | What is the lighting condition of your working area? | - 1. Very bright - 2. Bright - 3. Medium dull - 4. Dull - 5. Dark |
| 315 | Do you adjust the contrast of your computer/ other VDT devices with the surrounding brightness? | - 1. Yes - 2. No |
| 316 | Do you use an anti-glare / VDT filter / blue light filter for your computer screen? | - 1. Yes - 2. No |

**Part-IV: Computer Vision Syndrome**

**Direction:** Please indicate whether you experienced any of the following symptoms during the time you used your digital device. For each symptom fill the boxes with the number label for your most suitable choice from the given list. First fill the boxes for **frequency**, that is, how often the symptom occurs, then second, fill the boxes for **intensity** of the symptom:

|  | **Frequency of symptom** | ***Never……………………………….0***  ***Occasional…………….…………...1***  ***Often/Always………………………2*** |
| --- | --- | --- |
| 401 | Burning eyes |  |
| 402 | Itching eyes |  |
| 403 | Feeling of foreign body in the eyes |  |
| 404 | Tearing eyes |  |
| 405 | Excessive blinking |  |
| 406 | Eye redness |  |
| 407 | Eye pain |  |
| 408 | Heavy eyelids |  |
| 409 | Dryness in eyes |  |
| 410 | Blurred vision |  |
| 411 | Double vision |  |
| 412 | Difficulty focusing for near vision |  |
| 413 | Increased sensitivity to light |  |
| 414 | Coloured halos around objects |  |
| 415 | Feeling the sight is worsening |  |
| 416 | Headache |  |
| ***Remember: If you indicated NEVER for frequency, you should not mark anything for intensity.*** | | |
|  | **Intensity of symptom** | ***Moderate…………………………..1***  ***Intense……….……………………2*** |
| 401 | Burning eyes |  |
| 402 | Itching eyes |  |
| 403 | Feeling of foreign body in the eyes |  |
| 404 | Tearing eyes |  |
| 405 | Excessive blinking |  |
| 406 | Eye redness |  |
| 407 | Eye pain |  |
| 408 | Heavy eyelids |  |
| 409 | Dryness in eyes |  |
| 410 | Blurred vision |  |
| 411 | Double vision |  |
| 412 | Difficulty focusing for near vision |  |
| 413 | Increased sensitivity to light |  |
| 414 | Coloured halos around objects |  |
| 415 | Feeling the sight is worsening |  |
| 416 | Headache |  |

**Thank you for your participation!!**
